# Supplementary material
Source: PubMed Central journal article supplement (PMC2709490)
Supplement: NIHMS29032-supplement-01.pdf [file NIHMS29032-supplement-01.pdf]

## Supplemental Materials (Molecular Mechanics Parameter Development)

```
#####  
## Parameters for Mn2+ and Fosfomycin taken from Amber Parameter Database ##  
## Website - http://pharmacy.man.ac.uk/amber/ ##  
#####
```

Mn<sup>2+</sup> vdw parameters (from Concanavalin A study by G.M. Bradbrook et al.)

MASS

MN 55.00 0.00

NONB

MN 1.6900 0.0140

Manganese parameters (cont.)

mn.prp

MNG INT 0

CHANGE OMIT DU BEG

0.0

|   |      |    |   |   |    |    |        |         |         |       |
|---|------|----|---|---|----|----|--------|---------|---------|-------|
| 1 | DUMM | DU | M | 0 | -1 | -2 | 0.000  | 0.000   | 0.000   | 0.000 |
| 2 | DUMM | DU | M | 1 | 0  | -1 | 1.000  | 0.000   | 0.000   | 0.000 |
| 3 | DUMM | DU | M | 2 | 1  | 0  | 1.000  | 90.000  | 0.000   | 0.000 |
| 4 | MN   | MN | M |   |    |    | 29.683 | 127.561 | -18.450 | 2.000 |

DONE

STOP

-----  
Fosfomycin parameters (calix[4]arenes: PhD Thesis of Marc Baaden - 250800)

MASS

BOND

CT-P 331. 1.82

ANGLE

|          |     |       |                                          |
|----------|-----|-------|------------------------------------------|
| CT-P -O2 | 60. | 104.6 | angles from gopt / force const. (Baaden) |
| CT-CT-P  | 35. | 113.1 | " "                                      |
| OS-CT-P  | 50. | 124.3 | " "                                      |
| P -CT-H2 | 60. | 127.3 | " "                                      |

DIHEDRAL

X -CT-P -X 9 3.51 0. 3. tpl - JPC 94

NONBOND

```
#####
## Parameters for Fosfomycin and Glutathione (ILG) developed in collaboration ##
## with the research group of Professor Terry Lybrand ##
#####
```

Fosfomycin parameters (cont.)

fos.prp

FCN INT 0

CORRECT OMIT DU BEG

0.0

|    |     |    |   |    |    |    |       |         |         |         |
|----|-----|----|---|----|----|----|-------|---------|---------|---------|
| 1  | DU1 | DU | M | 0  | 0  | 0  | 0.000 | 0.000   | 0.000   |         |
| 2  | DU2 | DU | M | 1  | 0  | 0  | 1.000 | 0.000   | 0.000   |         |
| 3  | DU3 | DU | M | 2  | 1  | 0  | 1.000 | 90.000  | 0.000   |         |
| 4  | C1  | CT | M | 3  | 2  | 1  | 0.559 | 119.220 | 156.267 | -0.0043 |
| 5  | H11 | HC | E | 4  | 3  | 2  | 1.090 | 126.907 | 305.732 | -0.0119 |
| 6  | H12 | HC | E | 4  | 3  | 2  | 1.092 | 119.722 | 97.641  | -0.0119 |
| 7  | H13 | HC | E | 4  | 3  | 2  | 1.091 | 73.080  | 203.685 | -0.0119 |
| 8  | C2  | CT | M | 4  | 3  | 2  | 1.511 | 33.238  | 14.929  | 0.0434  |
| 9  | H2  | H1 | E | 8  | 4  | 3  | 1.083 | 116.259 | 184.228 | -0.0280 |
| 10 | O3  | OS | M | 8  | 4  | 3  | 1.469 | 114.639 | 49.091  | -0.4633 |
| 11 | C4  | CT | M | 10 | 8  | 4  | 1.518 | 59.584  | 247.771 | 0.0872  |
| 12 | H4  | H2 | E | 11 | 10 | 8  | 1.082 | 108.886 | 253.746 | -0.0113 |
| 13 | P   | P  | M | 11 | 10 | 8  | 1.877 | 124.338 | 116.285 | 1.0550  |
| 14 | O2P | O2 | E | 13 | 11 | 10 | 1.504 | 103.349 | 74.682  | -0.8810 |
| 15 | O3P | O2 | E | 13 | 11 | 10 | 1.519 | 104.574 | 313.185 | -0.8810 |
| 16 | O1P | O2 | E | 13 | 11 | 10 | 1.508 | 98.477  | 194.010 | -0.8810 |

LOOP

C2 C4

DONE

STOP

ILG - amino-terminal  $\gamma$ -glutamyl residue from glutathione (GSH)

ILG.prp

ILG INT 0

CORRECT OMIT DU BEG

0.0

|    |     |    |   |    |    |    |       |         |         |         |
|----|-----|----|---|----|----|----|-------|---------|---------|---------|
| 1  | DU1 | DU | M | 0  | 0  | 0  | 0.000 | 0.000   | 0.000   |         |
| 2  | DU2 | DU | M | 1  | 0  | 0  | 1.000 | 0.000   | 0.000   |         |
| 3  | DU3 | DU | M | 2  | 1  | 0  | 1.000 | 90.000  | 0.000   |         |
| 4  | N   | N3 | M | 3  | 2  | 1  | 1.262 | 149.168 | 315.313 | -0.8689 |
| 5  | H1  | H  | E | 4  | 3  | 2  | 1.005 | 133.615 | 120.590 | 0.3395  |
| 6  | H2  | H  | E | 4  | 3  | 2  | 1.110 | 83.034  | 220.761 | 0.3395  |
| 7  | H3  | H  | E | 4  | 3  | 2  | 1.007 | 111.441 | 327.265 | 0.3395  |
| 8  | CA  | CT | M | 4  | 3  | 2  | 1.480 | 29.196  | 65.498  | 0.2825  |
| 9  | HA  | HP | E | 8  | 4  | 3  | 1.085 | 107.123 | 107.881 | 0.0238  |
| 10 | C   | C  | B | 8  | 4  | 3  | 1.536 | 107.353 | 354.046 | 0.6306  |
| 11 | O   | O2 | E | 10 | 8  | 4  | 1.339 | 113.413 | 20.621  | -0.5382 |
| 12 | OXT | O2 | E | 10 | 8  | 4  | 1.203 | 123.852 | 198.954 | -0.5382 |
| 13 | CB  | CT | M | 8  | 4  | 3  | 1.533 | 113.868 | 229.142 | 0.0122  |
| 14 | HB2 | HC | E | 13 | 8  | 4  | 1.081 | 108.878 | 311.188 | 0.0095  |
| 15 | HB3 | HC | E | 13 | 8  | 4  | 1.085 | 109.375 | 68.078  | 0.0095  |
| 16 | CG  | CT | M | 13 | 8  | 4  | 1.533 | 113.389 | 190.403 | -0.0498 |
| 17 | HG2 | HC | E | 16 | 13 | 8  | 1.078 | 110.008 | 294.996 | 0.0086  |
| 18 | HG3 | HC | E | 16 | 13 | 8  | 1.088 | 109.915 | 53.520  | 0.0086  |
| 19 | CD  | C  | M | 16 | 13 | 8  | 1.519 | 110.542 | 171.884 | 0.5449  |
| 20 | OD  | O  | E | 19 | 16 | 13 | 1.222 | 122.434 | 343.497 | -0.5536 |

DONE

STOP

## References from Supplemental Materials:

M. Baaden\*, G. Wipff, F. Berny; \*Laboratory of Molecular Biophysics, University of Oxford  
M. Baaden, G. Wipff, M. R. Yaftian, M. Burgard and D. Matt (2000) Cation coordination by calix(*I*)arenes bearing amide and/or phosphine oxide pendant groups: how many arms are needed to bind Li<sup>+</sup> vs Na<sup>+</sup> ? A combined NMR and molecular dynamics study. *J. chem. Soc., Perkin Trans. 2.*, 1315.

Bradbrook GM, Gleichmann T, Harrop SJ, Habash J, Raftery J, Kalb J, Yariv J, Hillier IH, Helliwell JR (1998) X-ray and molecular dynamics studies of concanavalin-A glucoside and mannoside complexes - Relating structure to thermodynamics of binding. *Journal of the Chemical Society-Faraday Transactions.* 94,1603.

Ewing, T.J.A. and Lybrand, T.P. (1994) A Comparison of Perturbation Methods and Poisson-Boltzmann Electrostatics Calculations for Estimation of Relative Solvation Free Energies. *J Phys Chem* **98**:1748-1752.

D.A. Pearlman, D.A. Case, J.W. Caldwell, W.S. Ross, T.E. Cheatham, III, S. DeBolt, D. Ferguson, G. Seibel, and P. Kollman. AMBER, a package of computer programs for applying molecular mechanics, normal mode analysis, molecular dynamics and free energy calculations to simulate the structural and energetic properties of molecules. *Comp. Phys. Commun.*91,1-41 (1995).
